# Supplementary material for: The fabrication of a photo-carrier transfer channel for a near infrared up-conversion coupled photocathode via a sandwich-like nanostructure
Source: Royal Society of Chemistry journal article supplement (doi:10.1039/d1tc01845k), 2021-01-01
Supplement: d1tc01845k1.pdf [file d1tc01845k1.pdf]

# Fabrication of Photo-carrier Transfer Channel for Near Infrared Up-conversion Coupled Photocathode Via Sandwiched-like Nanostructure

XiChen, Yuyu Bu\*, HuanLi, XiaoWang, Jin-Ping Ao

Key Laboratory of Wide Band-Gap Semiconductor Materials and Devices, School of Microelectronics,  
Xidian University, Xi'an, 710071, China. mail: [yybu@xidian.edu.cn](mailto:yybu@xidian.edu.cn)

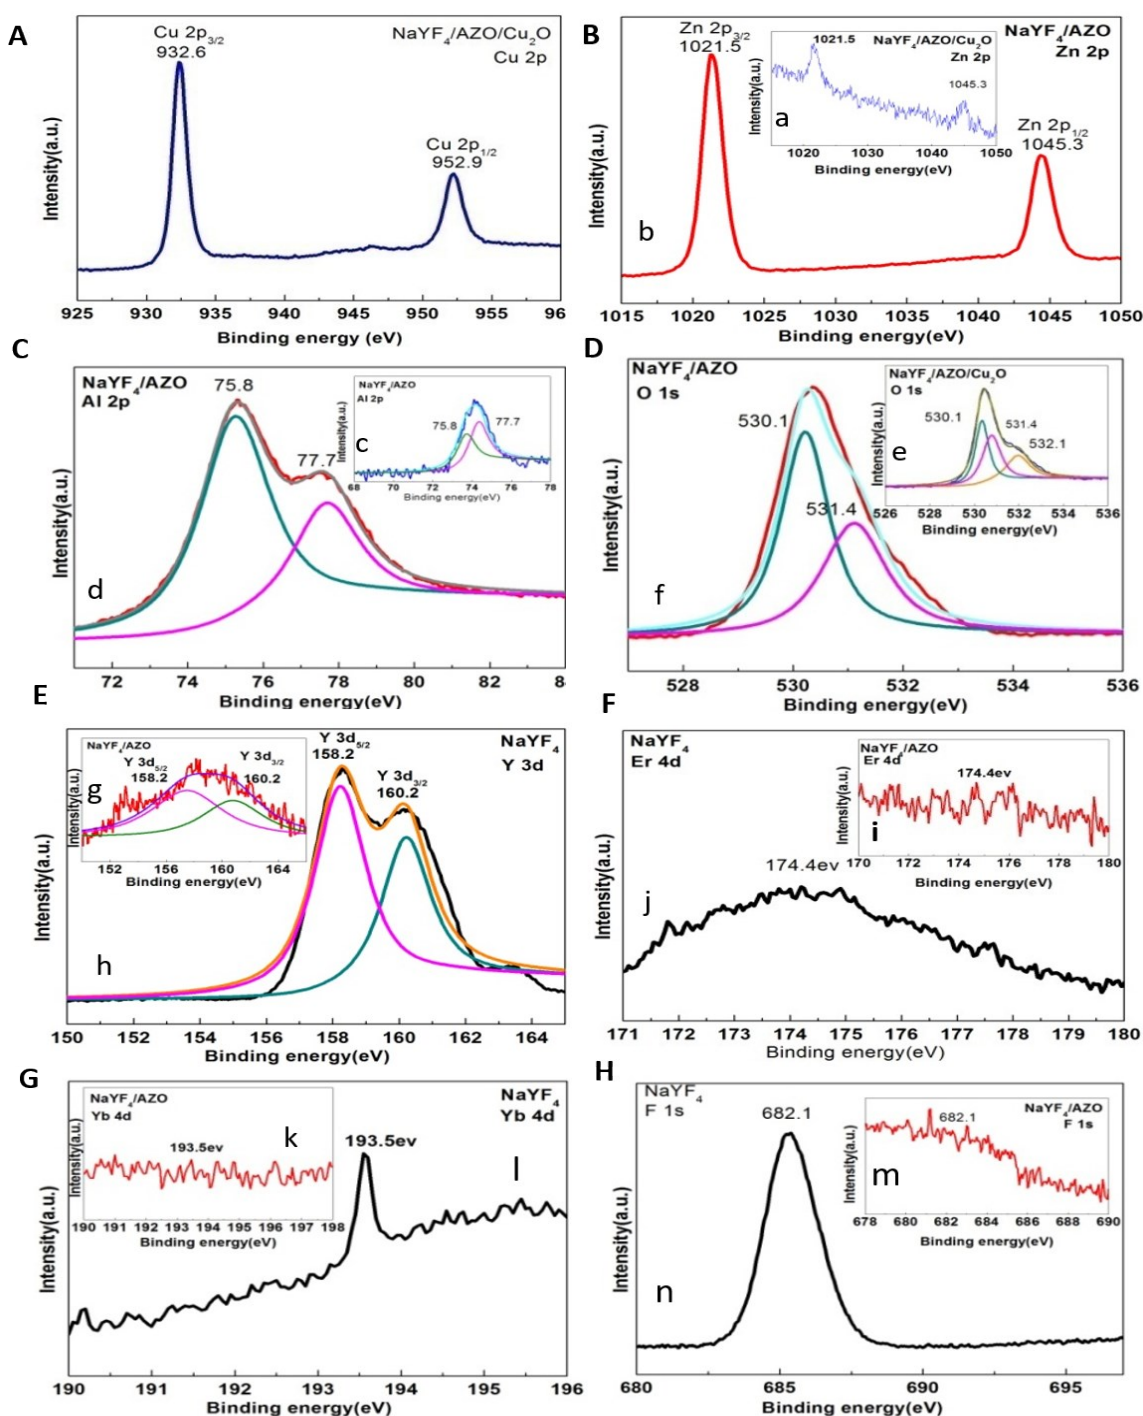

**Figure S1.** XPS spectra depicting peaks due to A) Cu 2p, B) Zn 2p, C) Al 2p, D) O 1s, E) Y 3d, F) Er 4d, G) Yb 4d, H) F 1s in NaYF<sub>4</sub>:Er<sup>3+</sup>-Yb<sup>3+</sup>/AZO/Cu<sub>2</sub>O sandwiched-like composite thin film.

**Fig.S1** shows the X-ray photoelectron spectroscopy (XPS) survey spectra of Cu, Zn, Al, O elements in NaYF<sub>4</sub>:Er<sup>3+</sup>-Yb<sup>3+</sup>, NaYF<sub>4</sub>:Er<sup>3+</sup>-Yb<sup>3+</sup>/AZO, and NaYF<sub>4</sub>:Er<sup>3+</sup>-Yb<sup>3+</sup>/AZO/Cu<sub>2</sub>O composite films. **Fig. S1A** is the XPS spectra of Cu 2*p* in NaYF<sub>4</sub>:Er<sup>3+</sup>-Yb<sup>3+</sup>/AZO/Cu<sub>2</sub>O sandwiched-like composite thin film, the Cu 2*p*<sub>3/2</sub> and Cu 2*p*<sub>1/2</sub> can be observed at 932.6 eV and 952.9 eV, respectively. In **Curve S1a**, the NaYF<sub>4</sub>:Er<sup>3+</sup>-Yb<sup>3+</sup>/AZO/Cu<sub>2</sub>O sandwiched-like composite thin film shows the presence of Zn 2*p* at 1021.5 eV and 1045.3 eV, and the peaks of Zn 2*p* in NaYF<sub>4</sub>:Er<sup>3+</sup>-Yb<sup>3+</sup>/AZO composite thin film are shown in **Curve S1b**, the **Fig.S1B** indicates the Zn 2*p* comes from AZO only. As shown in **Curve S1c** and **Curve S1d**, Al 2*p* can be observed at 75.8 eV and 77.7 eV, **Fig. S1C** indicates that Al 2*p* comes from AZO only. Due to Cu-O bonds, Zn-O bonds and Al-O bonds, in **CurveS1e** the presence of O 1*s* is observed on NaYF<sub>4</sub>:Er<sup>3+</sup>-Yb<sup>3+</sup>/AZO/Cu<sub>2</sub>O at 530.1 eV, 531.4 eV and 532.1 eV, respectively, and in **CurveS1f**, O1*s* peaks can be observed on NaYF<sub>4</sub>:Er<sup>3+</sup>-Yb<sup>3+</sup>/AZO at 530.1 eV, 531.4 eV, attribute to Zn-O bonds and Al-O bonds. The **Fig. S1D** indicates that there are only ZnO, Cu<sub>2</sub>O and Al<sub>2</sub>O<sub>3</sub> exist in NaYF<sub>4</sub>:Er<sup>3+</sup>-Yb<sup>3+</sup>/AZO, and NaYF<sub>4</sub>:Er<sup>3+</sup>-Yb<sup>3+</sup>/AZO/Cu<sub>2</sub>O composite films. In NaYF<sub>4</sub>:Er<sup>3+</sup>-Yb<sup>3+</sup> thin film, the peaks at 158.2 eV and 160.2 eV contributed by Y3*d*<sub>5/2</sub> and Y3*d*<sub>3/2</sub> can be seen in **Curve S1g**, in NaYF<sub>4</sub>:Er<sup>3+</sup>-Yb<sup>3+</sup>/AZO composite film, the peaks are in same location shown by **Curve S1h**, the **Fig. S1E** certify the existence of NaYF<sub>4</sub>. As shown in **Curve S1i**, the peak of Er4*d* in NaYF<sub>4</sub>:Er<sup>3+</sup>-Yb<sup>3+</sup>/AZO composite film is obscured, in NaYF<sub>4</sub>:Er<sup>3+</sup>-Yb<sup>3+</sup> thin film, the peaks at 174.4 eV contributed by Er4*d* can be seen in **Curve S1j**, the **Fig.S1F** certify that the Er element has been doped in NaYF<sub>4</sub> successfully. In **Curve S1k** the peak of Yb4*d* in NaYF<sub>4</sub>:Er<sup>3+</sup>-Yb<sup>3+</sup>/AZO composite film is obscured, in NaYF<sub>4</sub>:Er<sup>3+</sup>-Yb<sup>3+</sup> thin film, the peaks at 174.4 eV contributed by Er4*d* can be seen in **Curve S1j**, the **Fig S1G** certify that the Yb element has been doped in NaYF<sub>4</sub> successfully. The **Fig. S1H** indicates the existence of F.

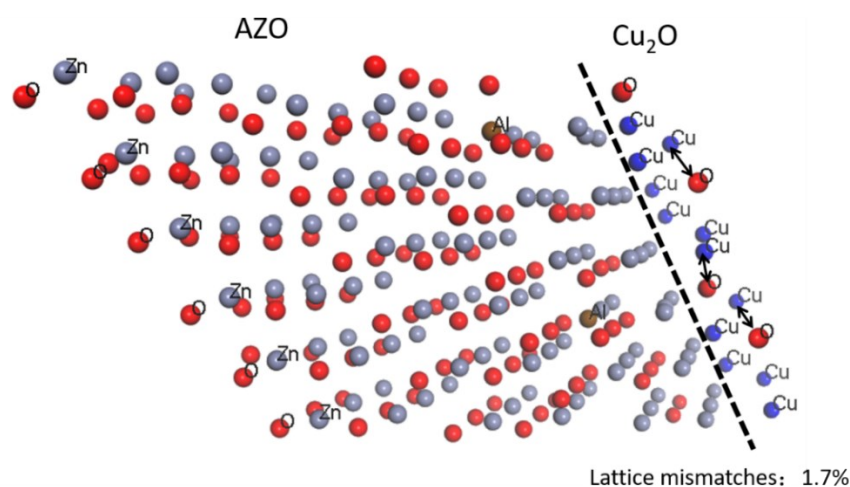

**Figure S2.** The lattice mismatch between AZO and Cu<sub>2</sub>O.

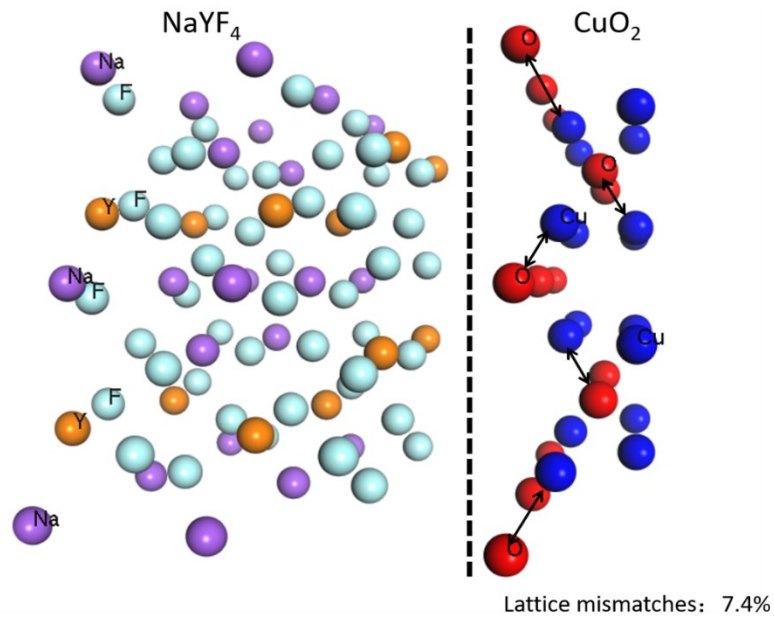

**Figure S3.** The lattice mismatch between NaYF<sub>4</sub> and Cu<sub>2</sub>O.

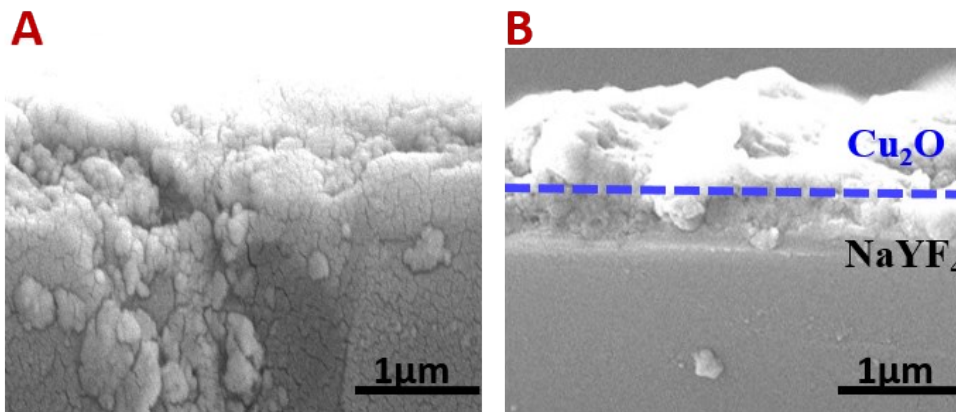

**Fig. S4.** A) Cross-section SEM image of NaYF<sub>4</sub>:Er<sup>3+</sup>-Yb<sup>3+</sup> thin film. B) Cross-section SEM mapping of NaYF<sub>4</sub>:Er<sup>3+</sup>-Yb<sup>3+</sup>/Cu<sub>2</sub>O composite thin film.

Fig.S4 shows the cross-section SEM image of NaYF<sub>4</sub>:Er<sup>3+</sup>-Yb<sup>3+</sup> film and NaYF<sub>4</sub>:Er<sup>3+</sup>-Yb<sup>3+</sup>/Cu<sub>2</sub>O composite thin film, respectively. The Cu<sub>2</sub>O above the NaYF<sub>4</sub>:Er<sup>3+</sup>-Yb<sup>3+</sup> has been deformation.

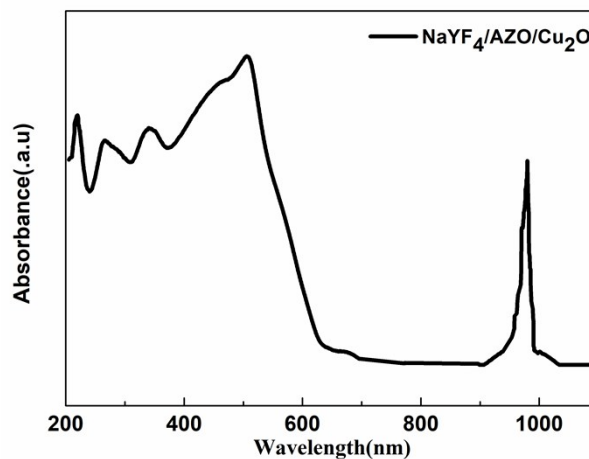

**Figure S5.** The UV-Vis of the NaYF<sub>4</sub>/AZO/Cu<sub>2</sub>O composite film.

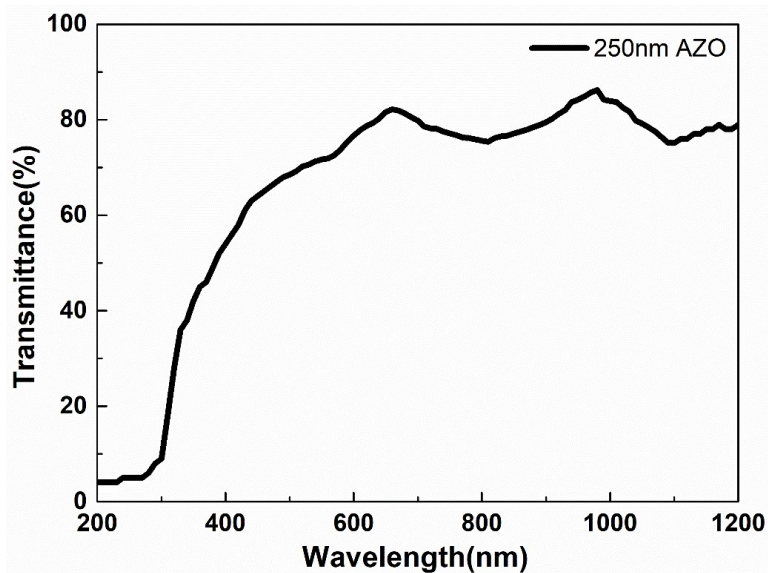

Figure S6. Transmission spectra of the 250 nm AZO film.

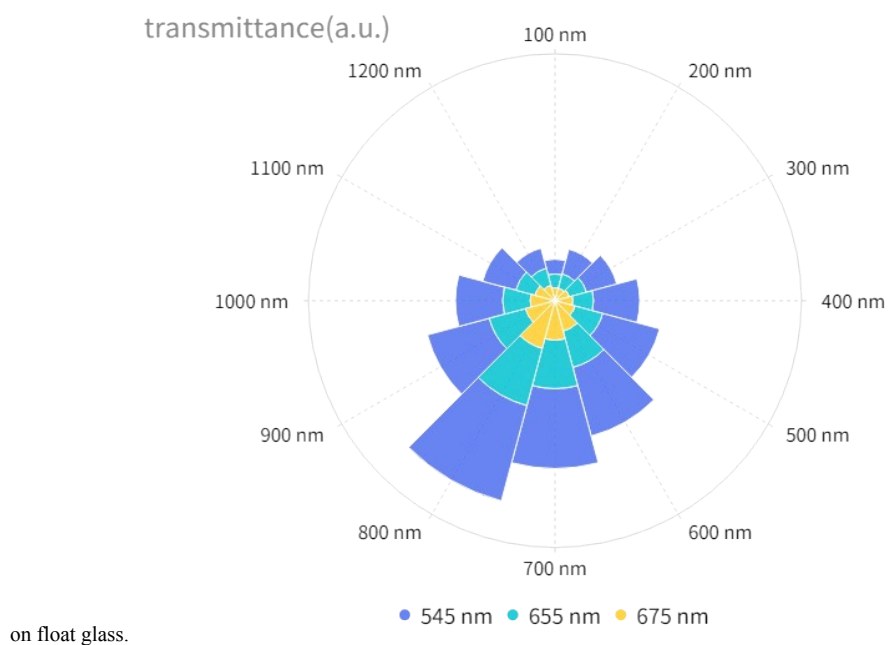

Figure S7. The UC fluorescence intensity of NaYF<sub>4</sub>:Er<sup>3+</sup>-Yb<sup>3+</sup> thin films with different thickness.

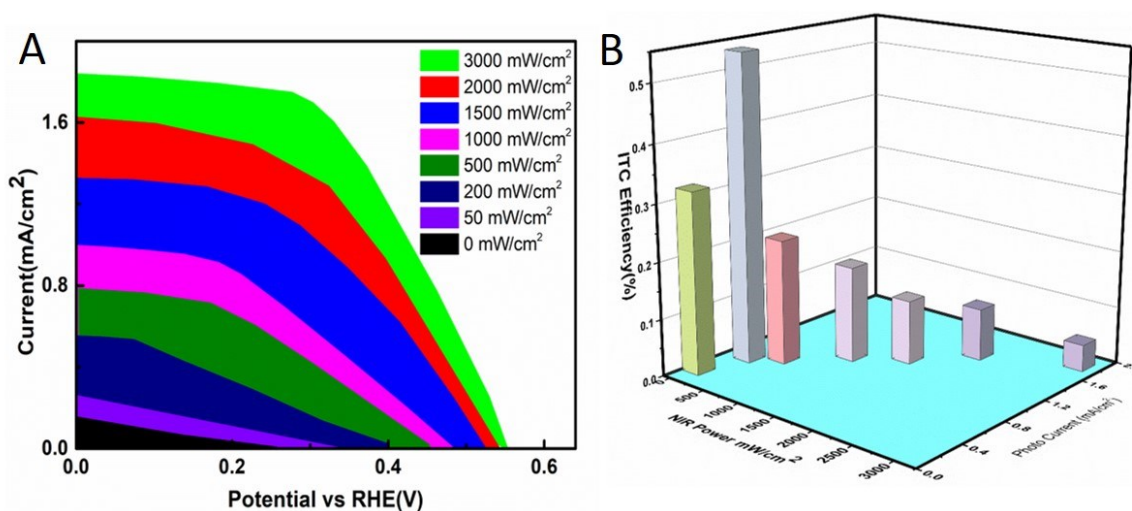

Fig. S8. A) I-V curves of NaYF<sub>4</sub>:Er<sup>3+</sup>-Yb<sup>3+</sup>/AZO/Cu<sub>2</sub>O composite film were measured in 0.1M Na<sub>2</sub>SO<sub>4</sub> (pH=6.1). B) ITC

of NaYF<sub>4</sub>:Er<sup>3+</sup>-Yb<sup>3+</sup>/AZO/Cu<sub>2</sub>O composite film.

**Fig.S8A** is the photo-induced I-V curve of NaYF<sub>4</sub>:Er<sup>3+</sup>-Yb<sup>3+</sup>/AZO/Cu<sub>2</sub>O photocathode by continuous 980 nm NIR excitation with different power density (0W excitation power means light off). **Fig.S8B** is the ITC efficiency of the NaYF<sub>4</sub>:Er<sup>3+</sup>-Yb<sup>3+</sup>/AZO/Cu<sub>2</sub>O photocathode with different NIR power density. The ITC depend on photoelectric conversion efficiency, the maximum ITC efficiency of the NaYF<sub>4</sub>:Er<sup>3+</sup>-Yb<sup>3+</sup>/AZO/Cu<sub>2</sub>O photocathode is 0.56% with 200 mW/cm<sup>2</sup> NIR excitation power. The Nernst **equation (1)** can convert potential vs. Ag/AgCl into the RHE potential. The ITC was calculated from the I-V curve with **equation (2)** in **Fig.S8B**, the  $I$  means the photocurrent,  $V$  is the bias voltage, and  $P_{light}$  means the NIR excitation power.

$$E_{RHE} = E_{Ag/AgCl} + 0.059 pH \quad (1)$$

$$ITC(\%) = \frac{\int_{V_{RHE}} IdV - \int_{V_{RHE}} I_{dark} dV}{P_{light}} \quad (2)$$

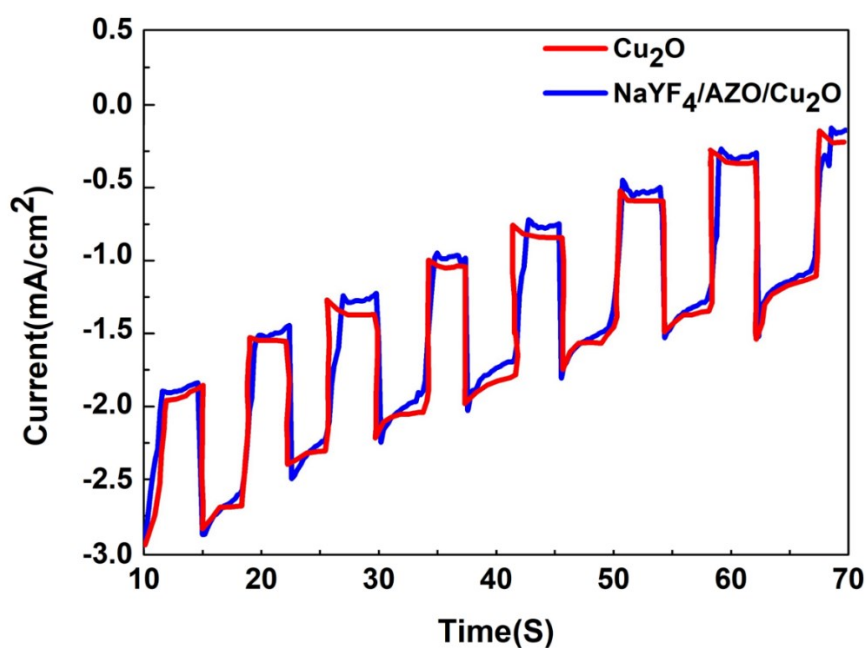

**FigureS9.** I-T curves of NaYF<sub>4</sub>:Er<sup>3+</sup>-Yb<sup>3+</sup>/AZO/Cu<sub>2</sub>O photocathode and Cu<sub>2</sub>O photocathode by sunlight from a Xe lamp.

**Fig. S9** is the photo-induced I-T curves of NaYF<sub>4</sub>:Er<sup>3+</sup>-Yb<sup>3+</sup>/AZO/Cu<sub>2</sub>O and Cu<sub>2</sub>O photocathodes at bias potential 0.5 V by sunlight on/off. The Cu<sub>2</sub>O is not stable in sunlight, it caused the dark photocurrent has been increased. The percentage of 980 nm photon is very low in solar spectrum, so the PEC performance only can be limitedly improved.

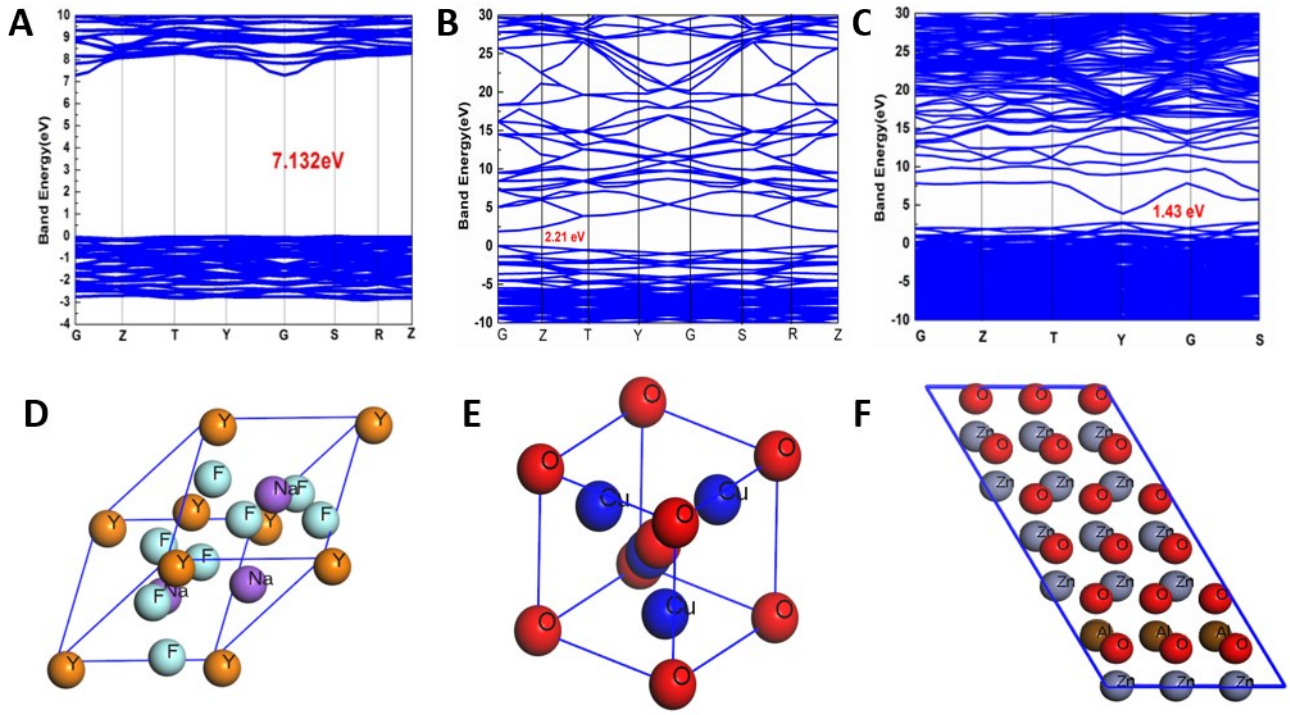

**Fig. S10.** A-C) The DOS of NaYF<sub>4</sub>, Cu<sub>2</sub>O and AZO. D-F) The crystal structure of NaYF<sub>4</sub> and Cu<sub>2</sub>O, AZO.

The Density of State (DOS) of NaYF<sub>4</sub>:Er<sup>3+</sup>-Yb<sup>3+</sup>, AZO and Cu<sub>2</sub>O and corresponding crystal structure has been showed in **Fig S10**. According to **equation (3)**, the electron effective mass has been calculated, the E is the bottom of conduct band.

$$m_{e^*} = \hbar^2 \left( \frac{d^2 E}{d^2 \kappa} \right)^{-1} \quad (3)$$
